# Supplementary material for: Multi-Targeting Bioactive Compounds Extracted from Essential Oils as Kinase Inhibitors
Source: PubMed Central journal article supplement (PMC7249159; doi:10.3390/molecules25092174), 2020-05-06
Supplement: molecules-25-02174-s001.pdf [file molecules-25-02174-s001.pdf]

## Supplementary Material

# Multi-Targeting bioactive compounds extracted from Essential Oils as kinase inhibitors

Annalisa Maruca <sup>1,2</sup>, Delia Lanzillotta <sup>3</sup>, Roberta Rocca <sup>2,3</sup>, Antonio Lupia <sup>2</sup>, Giosuè Costa <sup>1,2</sup>, Raffaella Catalano <sup>1,2</sup>, Federica Moraca <sup>2,4</sup>, Eugenio Gaudio <sup>5</sup>, Francesco Ortuso <sup>1,2</sup>, Anna Artese <sup>1,2</sup>, Francesco Trapasso <sup>3</sup>, Stefano Alcaro <sup>1,2,\*</sup>

<sup>1</sup> Dipartimento di Scienze della Salute, Università "Magna Græcia" di Catanzaro, Campus Universitario "S. Venuta", Viale Europa, Loc. Germaneto, 88100 Catanzaro, Italy.

<sup>2</sup> Net4Science srl, Università "Magna Græcia" di Catanzaro, Campus Salvatore Venuta, Viale Europa, 88100, Catanzaro, Italy.

<sup>3</sup> Department of Experimental and Clinical Medicine, Università "Magna Græcia" di Catanzaro, Campus Universitario "S. Venuta", Viale Europa, Loc. Germaneto, 88100 Catanzaro, Italy.

<sup>4</sup> University "Federico II" of Naples, Department of Pharmacy, Via D. Montesano 49, Naples, 80131, Italy.

<sup>5</sup> Lymphoma and Genomics Research Program, The Institute of Oncology Research, Bellinzona, Switzerland.

\*Correspondence: Stefano Alcaro [alcaro@unicz.it](mailto:alcaro@unicz.it) +39 0961 3694198 / +39 0961 391490

Received: date; Accepted: date; Published: date

**Table S1.** Percentage of compounds contained in essential oils (EOs).

| Oil Name            | Compounds               | Botanic name                                                    | Percentage (%) |
|---------------------|-------------------------|-----------------------------------------------------------------|----------------|
| Styrax              | Cinnamyl cinnamate      | <i>Liquidambar styraciflua</i> L.,<br>fam. Hamamelidaceae       | 38.00          |
| Cumin               | $\alpha$ -terpinen-7-al | <i>Cuminum cyminum</i> L.,<br>fam. Apiaceae (Umbelliferae)      | 17.77          |
| Ageratum conyzoides | Precocene II            | <i>Ageratum conyzoides</i> L.,<br>fam. Asteraceae               | 17.65          |
| Vetiver             | $\beta$ -vetivone       | <i>Vetiveria zizanioides</i> Stapf,<br>fam. Poaceae (Gramineae) | 5.00           |
| Parsley leaf        | Psoralen                | <i>Petroselinum crispum</i> ,<br>fam. Apiaceae                  | 3.20           |
| Rue 1               | Piperonylacetone        | <i>Ruta graveolens</i> L.,<br>fam. Rutaceae                     | 3.10           |
| Oregano             | Thymohydroquinone       | <i>Coridothymus capitatus</i> Rchb.,<br>fam. Lamiaceae          | 1.40           |
| Jasmine sambac      | 1H-indol-2ol            | <i>Jasminum sambac</i> (L.) Aiton,<br>fam. Oleaceae             | 0.50           |
| Cassie absolute     | Isoquinoline            | <i>Acacia farnesiana</i> (L.) Willd.,<br>fam. Mimosaceae        | 0.50           |
| Oakmoss             | Atronorin               | <i>Evernia prunastri</i> (L.) Ach.,<br>fam. Usneaceae           | 0.30           |
| Vassoura            | 1H-benzochromene        | <i>Baccharis dracunculifolia</i> DC.,<br>fam. Asteraceae        | 0.20           |
| Star anise          | Hinokitiol              | <i>Illicium verum</i> Hooker fil.,<br>fam. Magnoliaceae         | 0.19           |
| Ginger              | 3-Phenylbenzaldehyde    | <i>Zingiber officinale</i> Roscoe,<br>fam. Zingiberaceae        | 0.01           |

**Table S2.** For each analysed target: the PDB accession code, the name of the co-crystallized ligand and the relative binding affinity G-score value (in kcal/mol) after re-docking simulations.

| Target | PDB code | Co-crystallized ligand                                                                                                                | G-score |
|--------|----------|---------------------------------------------------------------------------------------------------------------------------------------|---------|
| c-Met  | 2WGJ     | Crizotinib                                                                                                                            | -12.03  |
| VEGFR2 | 3VHE     | Pyrrolopyrimidine derivative                                                                                                          | -13.90  |
| EGFR   | 3POZ     | Tak-285                                                                                                                               | -13.89  |
| B-Raf  | 2FB8     | SB-590885                                                                                                                             | -10.95  |
| PDK1   | 3NAX     | 1-(3,4-difluorobenzyl)-2-oxo-N-((1R)-2-[(2-oxo-2,3-dihydro-1H-benzimidazol-5-yl)oxy]-1-phenylethyl)-1,2-dihydropyridine-3-carboxamide | -18.82  |
| BMX    | 3SXR     | Dasatinib                                                                                                                             | -11.29  |
| ROCK1  | 3TWJ     | RKI1447                                                                                                                               | -8.93   |

**Table S3.** G-score and IFD scores, expressed in kcal/mol, of PDB co-crystallized ligands complexed with their related kinase proteins.

| Target   | G-score | IFD Score |
|----------|---------|-----------|
| VEGFR2   | -14.20  | -877.00   |
| ROCK1    | -9.23   | -870.20   |
| EGFR     | -15.87  | -669.32   |
| PDK1     | -19.61  | -621.81   |
| BMX      | -12.68  | -587.91   |
| B-Raf wt | -10.15  | -574.98   |
| c-Met    | -14.45  | -643.86   |

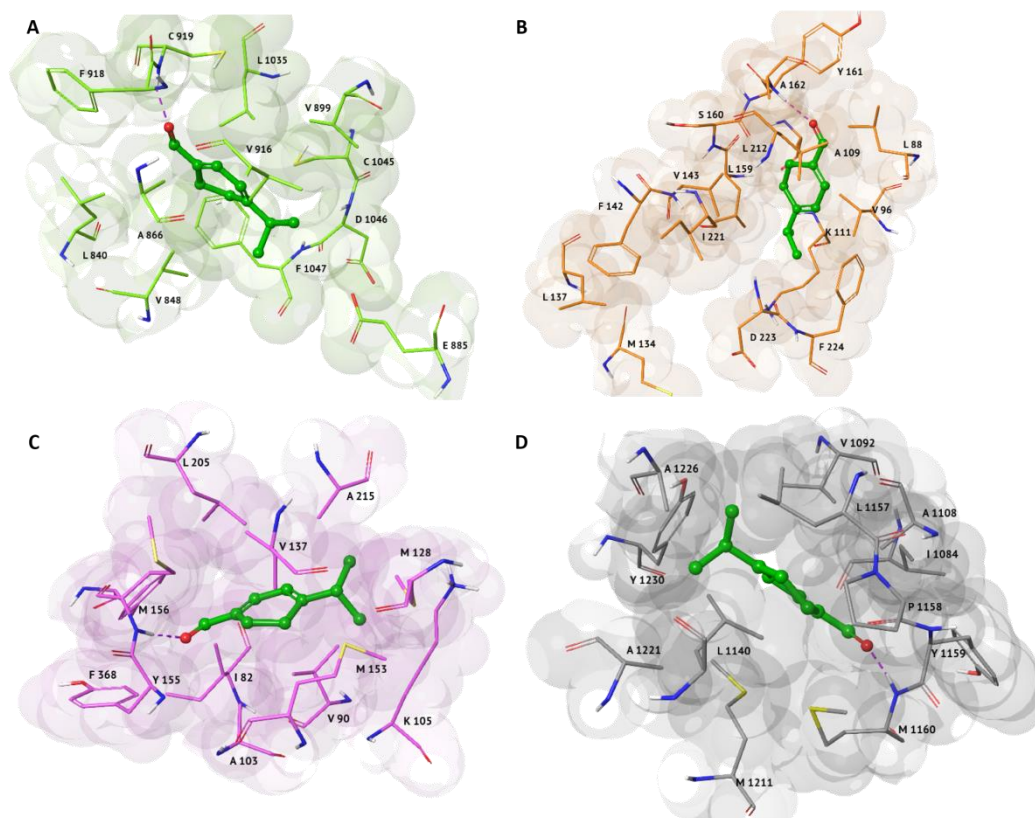

**Figure S1.** 3D representations of the best IFD pose of  $\alpha$ -terpinen-7-ol with the following anti-cancer targets: (A) VEGFR2 (PDB: 3VHE), represented as green surface; (B) PDK1 (PDB: 3NAX), represented as orange surface; (C) ROCK1 (3TWJ), represented as pink surface; (D) c-Met (PDB: 2WGI), represented as grey surface. Ligands are shown in green carbon ball-and-sticks, while amino acid residues involved in the molecular interactions are shown as carbon sticks with the correspondent color of protein's surface. H-bonds and  $\pi$ - $\pi$  interactions are displayed as purple and cyan dashed lines, respectively.

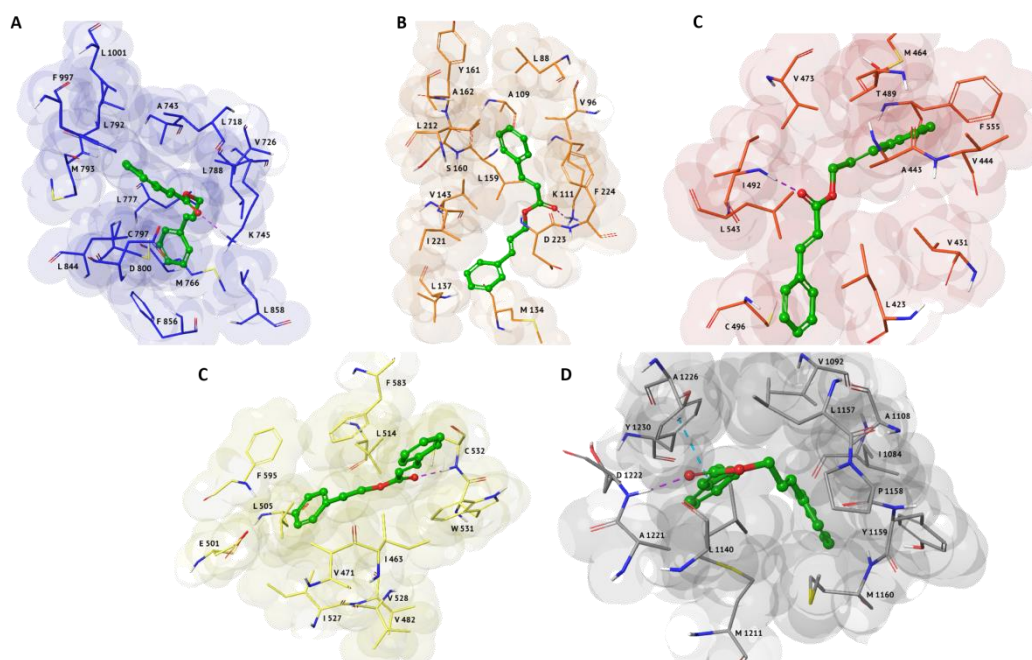

**Figure S2.** 3D representations of the best IFD pose of cinnamyl cinnamate with the following anti-cancer targets: (A) EGFR (PDB: 3POZ), represented as blue surface; (B) PDK1 (PDB: 3NAX), represented as orange surface; (C)

BMX (PDB: 3SXR), represented as red surface; (D) B-Raf (PDB: 2FB8), represented as yellow surface; (E) c-Met (PDB: 2WGJ), represented as grey surface. Ligands are shown in green carbon ball-and-sticks, while amino acid residues involved in the molecular interactions are shown as carbon sticks with the correspondent color of protein's surface. H-bonds and  $\pi$ - $\pi$  interactions are displayed as purple and cyan dashed lines, respectively.

**Table S4.** Target and abbreviations of the 23 Protein Kinases targets, selected for the SBVS study, with the relative PDB accession code and X-ray resolution expressed in Å. For each target, the RMSD value, expressed in Å, was calculated after re-docking simulation between the experimental pose of the co-crystallized ligand and the best pose generated by the docking protocol. The binding energy of the re-docked pose was reported as G-score value, expressed in kcal /mol.

| Target                                                     | Abbreviation | PDB models | Resolution | RMSD | G-score |
|------------------------------------------------------------|--------------|------------|------------|------|---------|
| Serine/threonine-protein kinases                           | Akt          | 4GV1       | 1.49       | 1.06 | -11.63  |
| Aurora A kinase                                            | AAK          | 2X81       | 2.91       | 0.47 | -9.38   |
| Aurora B kinase                                            | ABK          | 2VRX       | 1.86       | 0.74 | -10.18  |
| Cytoplasmic tyrosine-protein kinase                        | BMX          | 3SXR       | 2.40       | 0.89 | -11.29  |
| B-Raf proto-oncogene serine/threonine-protein kinase       | B-Raf        | 2FB8       | 2.90       | 0.68 | -10.95  |
| B-Raf proto-oncogene serine/threonine-protein kinase V600E | B-Raf V600E  | 3OG7       | 2.45       | 1.62 | -12.24  |
| Cyclin-dependent kinase 2                                  | CDK2         | 4KD1       | 1.70       | 1.39 | -11.61  |
| Hepatocyte growth factor receptor                          | c-Met        | 2WGJ       | 1.20       | 0.85 | -12.03  |
| Epidermal growth factor receptor                           | EGFR         | 3POZ       | 1.50       | 0.89 | -13.89  |
| Epidermal growth factor receptor V948R                     | EGFR V948R   | 4I22       | 1.71       | 1.01 | -8.71   |
| Extracellular signal regulated Kinases 1                   | ERK1         | 2ZOQ       | 2.39       | 0.37 | -9.26   |
| Extracellular signal regulated Kinases 2                   | ERK2         | 4ZZN       | 1.45       | 0.58 | -12.41  |
| Glycogen synthase kinase-3 $\beta$                         | GSK3 $\beta$ | 4ACC       | 2.21       | 1.20 | -9.15   |
| Kinesin-like protein KIF11                                 | Kinesis Eg5  | 2X7C       | 1.90       | 0.12 | -10.31  |
| Mitogen-activated protein kinase 1                         | MEK1         | 4ARK       | 2.60       | 0.71 | -8.64   |
| Mitogen-activated protein kinase 2                         | MEK2         | 1S9I       | 3.20       | 0.38 | -8.61   |

|                                                      |                 |      |      |      |        |
|------------------------------------------------------|-----------------|------|------|------|--------|
| <b>3-Phosphoinositide-dependent protein kinase 1</b> | PDK1            | 3NAX | 1.75 | 0.34 | -18.82 |
| <b>Phosphoinositide-3-kinase <math>\alpha</math></b> | PI3K $\alpha$   | 5UBR | 2.40 | 0.92 | -10.48 |
| <b>Phosphoinositide-3-kinase <math>\gamma</math></b> | PI3K $\gamma$   | 3DBS | 2.80 | 0.78 | -9.34  |
| <b>cAMP-dependent protein kinase</b>                 | PKA C- $\alpha$ | 3POO | 1.60 | 0.23 | -12.35 |
| <b>Rho-associated protein kinase 1</b>               | ROCK1           | 3TWJ | 2.90 | 0.55 | -8.98  |
| <b>Serum and glucocorticoid-regulated kinase 1</b>   | SGK1            | 3HDM | 2.60 | 0.68 | -9.77  |
| <b>Vascular endothelial growth factor receptor 2</b> | VEGFR2          | 3VHE | 1.55 | 0.34 | -13.90 |
